# Supplementary material for: Ethnic disparities in progression rates for sight-threatening diabetic retinopathy in diabetic eye screening: a population-based retrospective cohort study
Source: PubMed Central journal article supplement (PMC10649497; doi:10.1136/bmjdrc-2023-003683), 2023-11-10
Supplement: bmjdrc-2023-003683supp001.pdf [file bmjdrc-2023-003683supp001.pdf]

## Supplementary material

### Table of Contents

|                                                                                                                                                                                                                                                                                                                                                              |    |
|--------------------------------------------------------------------------------------------------------------------------------------------------------------------------------------------------------------------------------------------------------------------------------------------------------------------------------------------------------------|----|
| Supplementary figure 1. Diagram of exclusions. ....                                                                                                                                                                                                                                                                                                          | 2  |
| Supplementary figure 2. Survival plot for development of referable diabetic retinopathy fitted with interval censoring and the Turnbull estimator stratified by baseline diabetic retinopathy grade and age..                                                                                                                                                | 3  |
| Supplementary table 1. Sight-threatening diabetic retinopathy events in ethnic groups by baseline diabetic retinopathy grade at baseline. ....                                                                                                                                                                                                               | 4  |
| Supplementary table 2. Incidence rate of sight-threatening-diabetic-retinopathy per 100 person-years by follow-up period (95% confidence intervals). ....                                                                                                                                                                                                    | 5  |
| Supplementary table 3. Sensitivity analysis using incidence rate of referable diabetic retinopathy per 100 person-years by follow-up period defined by 95% confidence intervals. Excluding people from the earliest 2 years of study period (see table 3 of our manuscript for comparison). ....                                                             | 6  |
| Supplementary table 4. Incidence rates of any diabetic retinopathy (people with R0M0 at first screen, n = 107,701) and sight-threatening diabetic retinopathy (people with R0M0 and R1M0 at first screen, n = 137,591) per 100 person-years by ethnic group.....                                                                                             | 7  |
| Supplementary table 5. Cumulative incidence rate of any diabetic retinopathy per 100 person-years by follow-up (95% confidence intervals). ....                                                                                                                                                                                                              | 8  |
| Supplementary table 6. Semi-parametric multivariable Cox proportional hazards model for interval censored data. Hazard ratios (HR) are mutually adjusted for all factors shown in the table. HR greater than 1 imply greater hazards for vision-threatening diabetic retinopathy (DR). Bold p-values show statistically significant results. ....            | 9  |
| Supplementary table 7. Multivariable Cox proportional hazards model for right censored data with development of any diabetic retinopathy (DR) as outcome of interest. Hazard ratios (HR) are mutually adjusted for all factors shown in the table. HR greater than 1 imply greater hazards for DR. Bold p-values show statistically significant results..... | 10 |

## Supplementary figure 1. Diagram of exclusions.

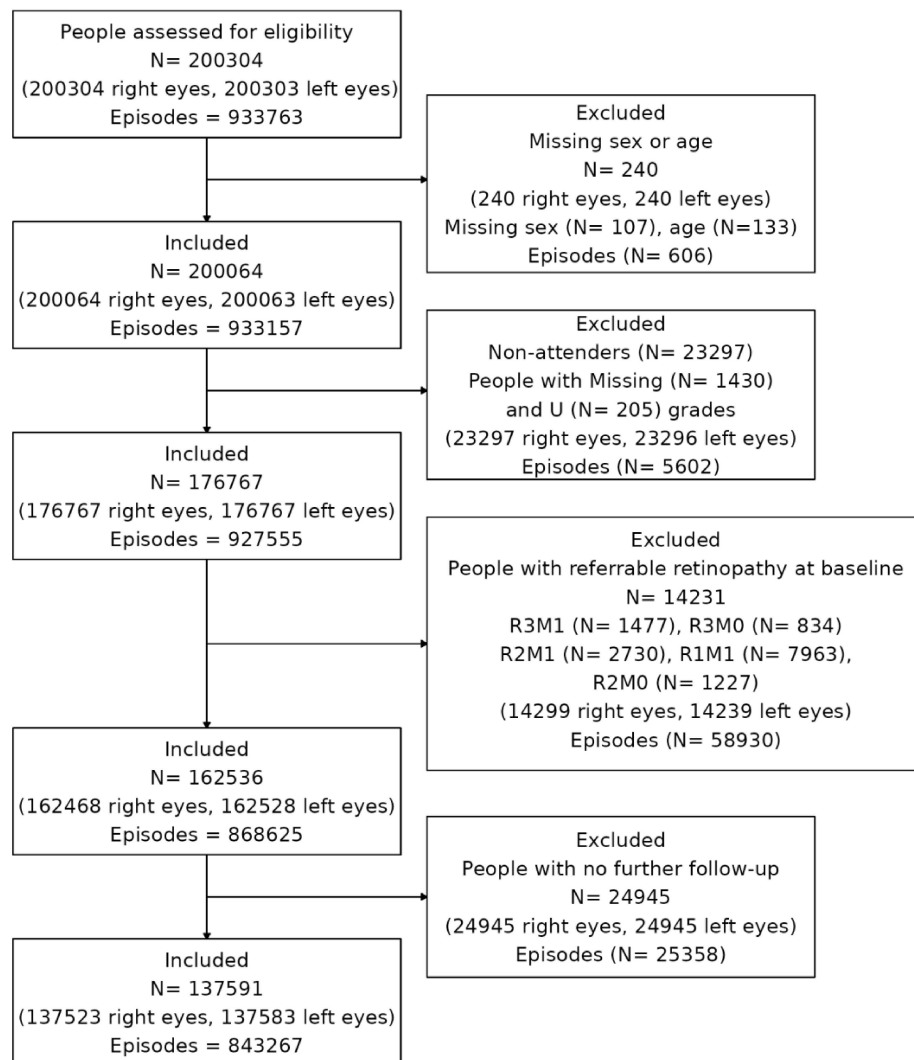

### Supplementary figure 2. Survival plot for development of referable diabetic retinopathy fitted with interval censoring and the Turnbull estimator stratified by baseline diabetic retinopathy grade and age.

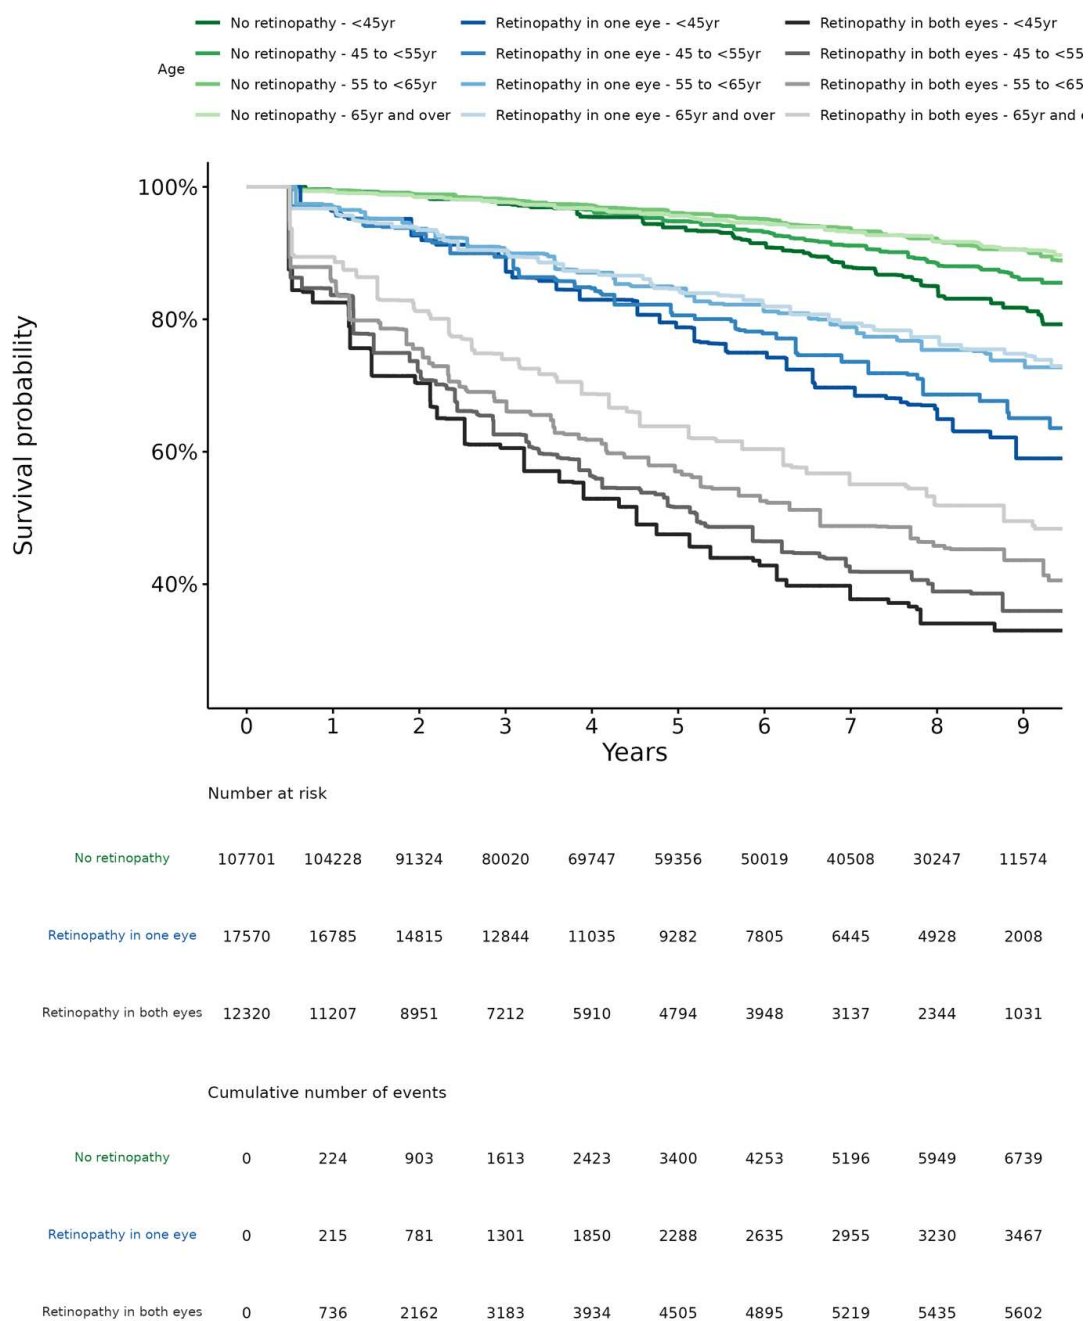

### Supplementary table 1. Sight-threatening diabetic retinopathy events in ethnic groups by baseline diabetic retinopathy grade at baseline.

| Characteristic   | Overall, N = 16,388 | No retinopathy, N = 7,116 | Retinopathy in one eye, N = 3,583 | Retinopathy in both eyes, N = 5,689 |
|------------------|---------------------|---------------------------|-----------------------------------|-------------------------------------|
| <b>Ethnicity</b> |                     |                           |                                   |                                     |
| White            | 4,782 (29%)         | 1,854 (26%)               | 992 (28%)                         | 1,936 (34%)                         |
| South Asian      | 6,532 (40%)         | 2,942 (41%)               | 1,463 (41%)                       | 2,127 (37%)                         |
| Black            | 3,186 (19%)         | 1,542 (22%)               | 716 (20%)                         | 928 (16%)                           |
| Any other Asian  | 990 (6.0%)          | 394 (5.5%)                | 239 (6.7%)                        | 357 (6.3%)                          |
| Other            | 503 (3.1%)          | 231 (3.2%)                | 106 (3.0%)                        | 166 (2.9%)                          |
| Mixed            | 201 (1.2%)          | 88 (1.2%)                 | 34 (0.9%)                         | 79 (1.4%)                           |
| Chinese          | 85 (0.5%)           | 29 (0.4%)                 | 15 (0.4%)                         | 41 (0.7%)                           |
| Unknown          | 109 (0.7%)          | 36 (0.5%)                 | 18 (0.5%)                         | 55 (1.0%)                           |

n (column %)

## Supplementary table 2. Incidence rate of sight-threatening-diabetic-retinopathy per 100 person-years by follow-up period (95% confidence intervals).

| Characteristic           | 0-1yr              | 1-2yr                 | 2-3yr                 | 3-4yr                 | 4-5yr                 | 5-10yr              |
|--------------------------|--------------------|-----------------------|-----------------------|-----------------------|-----------------------|---------------------|
| <b>Overall</b>           | 0.86 (0.82 - 0.90) | 2.18 (2.11 - 2.24)    | 2.09 (2.03 - 2.16)    | 2.26 (2.19 - 2.34)    | 2.48 (2.39 - 2.57)    | 3.10 (2.99 - 3.20)  |
| <b>Age groups</b>        |                    |                       |                       |                       |                       |                     |
| Less than 45 years       | 0.90 (0.81 - 0.99) | 2.38 (2.23 - 2.53)    | 2.39 (2.22 - 2.56)    | 2.82 (2.62 - 3.01)    | 3.32 (3.09 - 3.55)    | 4.89 (4.58 - 5.20)  |
| 45 to <55 years          | 0.86 (0.78 - 0.95) | 2.29 (2.15 - 2.43)    | 2.26 (2.12 - 2.41)    | 2.25 (2.09 - 2.40)    | 2.85 (2.66 - 3.03)    | 3.49 (3.26 - 3.71)  |
| 55 to <65 years          | 0.85 (0.77 - 0.93) | 2.04 (1.91 - 2.17)    | 1.94 (1.81 - 2.08)    | 2.07 (1.92 - 2.22)    | 2.00 (1.85 - 2.15)    | 2.54 (2.35 - 2.72)  |
| 65 years and over        | 0.84 (0.77 - 0.91) | 2.06 (1.94 - 2.18)    | 1.90 (1.78 - 2.01)    | 2.09 (1.96 - 2.23)    | 2.08 (1.93 - 2.22)    | 2.28 (2.11 - 2.45)  |
| <b>Sex</b>               |                    |                       |                       |                       |                       |                     |
| Female                   | 0.78 (0.72 - 0.84) | 2.00 (1.91 - 2.09)    | 2.02 (1.92 - 2.12)    | 2.15 (2.04 - 2.26)    | 2.29 (2.17 - 2.41)    | 2.89 (2.74 - 3.04)  |
| Male                     | 0.93 (0.87 - 0.99) | 2.33 (2.24 - 2.42)    | 2.16 (2.06 - 2.26)    | 2.36 (2.25 - 2.47)    | 2.65 (2.53 - 2.77)    | 3.29 (3.14 - 3.44)  |
| <b>Ethnicity</b>         |                    |                       |                       |                       |                       |                     |
| White                    | 0.76 (0.69 - 0.82) | 1.80 (1.70 - 1.90)    | 1.76 (1.66 - 1.87)    | 1.92 (1.80 - 2.04)    | 1.87 (1.75 - 2.00)    | 2.37 (2.21 - 2.52)  |
| South Asian              | 0.85 (0.78 - 0.92) | 2.28 (2.16 - 2.39)    | 2.12 (2.00 - 2.23)    | 2.40 (2.27 - 2.53)    | 2.74 (2.59 - 2.89)    | 3.62 (3.43 - 3.80)  |
| Black                    | 1.08 (0.97 - 1.19) | 2.75 (2.56 - 2.93)    | 2.63 (2.44 - 2.82)    | 2.59 (2.38 - 2.80)    | 3.05 (2.81 - 3.29)    | 3.65 (3.36 - 3.93)  |
| Any other Asian          | 0.84 (0.67 - 1.01) | 2.26 (1.98 - 2.54)    | 2.04 (1.76 - 2.33)    | 2.57 (2.23 - 2.91)    | 2.87 (2.49 - 3.25)    | 2.80 (2.40 - 3.21)  |
| Other                    | 1.07 (0.80 - 1.34) | 1.81 (1.46 - 2.16)    | 2.39 (1.96 - 2.83)    | 2.16 (1.72 - 2.61)    | 2.53 (2.02 - 3.05)    | 3.46 (2.81 - 4.11)  |
| Mixed                    | 0.75 (0.41 - 1.09) | 1.98 (1.42 - 2.54)    | 2.65 (1.95 - 3.36)    | 3.00 (2.17 - 3.83)    | 3.44 (2.46 - 4.42)    | 3.31 (2.25 - 4.37)  |
| Chinese                  | 1.16 (0.59 - 1.73) | 2.13 (1.35 - 2.92)    | 2.29 (1.42 - 3.16)    | 1.41 (0.67 - 2.15)    | 1.44 (0.64 - 2.24)    | 1.56 (0.66 - 2.46)  |
| Unknown                  | 0.91 (0.57 - 1.26) | 4.18 (3.36 - 5.00)    | 5.20 (3.88 - 6.51)    | 3.77 (2.03 - 5.51)    | 4.06 (1.73 - 6.39)    | 2.02 (-0.10 - 4.15) |
| <b>Baseline DR grade</b> |                    |                       |                       |                       |                       |                     |
| No retinopathy           | 0.21 (0.19 - 0.23) | 0.70 (0.66 - 0.74)    | 0.83 (0.78 - 0.88)    | 1.08 (1.02 - 1.14)    | 1.51 (1.43 - 1.59)    | 2.30 (2.20 - 2.40)  |
| Retinopathy in one eye   | 1.23 (1.10 - 1.37) | 3.63 (3.40 - 3.87)    | 3.79 (3.53 - 4.05)    | 4.61 (4.31 - 4.92)    | 4.33 (4.01 - 4.65)    | 5.05 (4.68 - 5.42)  |
| Retinopathy in both eyes | 6.04 (5.69 - 6.39) | 14.48 (13.94 - 15.03) | 12.79 (12.21 - 13.37) | 11.57 (10.95 - 12.19) | 10.75 (10.08 - 11.41) | 9.30 (8.61 - 9.99)  |

**Supplementary table 3. Sensitivity analysis using incidence rate of referable diabetic retinopathy per 100 person-years by follow-up period defined by 95% confidence intervals. Excluding people from the earliest 2 years of study period (see table 3 of our manuscript for comparison).**

| <b>Characteristic</b>    | <b>0-1yr</b>        | <b>1-2yr</b>           | <b>2-3yr</b>           | <b>3-4yr</b>           | <b>4-5yr</b>           | <b>5-8yr</b>           |
|--------------------------|---------------------|------------------------|------------------------|------------------------|------------------------|------------------------|
| <b>Overall</b>           | 0.65 (0.60 - 0.71)  | 1.65 (1.56 - 1.74)     | 1.56 (1.46 - 1.66)     | 1.69 (1.57 - 1.81)     | 2.37 (2.21 - 2.54)     | 2.99 (2.76 - 3.22)     |
| <b>Age groups</b>        |                     |                        |                        |                        |                        |                        |
| Less than 45 years       | 0.88 (0.76 - 1.01)  | 1.98 (1.79 - 2.17)     | 1.92 (1.71 - 2.13)     | 2.31 (2.04 - 2.57)     | 3.34 (2.97 - 3.72)     | 3.87 (3.36 - 4.38)     |
| 45 to <55 years          | 0.57 (0.47 - 0.67)  | 1.58 (1.41 - 1.75)     | 1.67 (1.47 - 1.87)     | 1.48 (1.27 - 1.69)     | 2.42 (2.11 - 2.73)     | 2.94 (2.52 - 3.37)     |
| 55 to <65 years          | 0.54 (0.44 - 0.65)  | 1.36 (1.19 - 1.53)     | 1.28 (1.09 - 1.46)     | 1.59 (1.36 - 1.83)     | 1.90 (1.60 - 2.19)     | 2.39 (1.97 - 2.80)     |
| 65 years and over        | 0.59 (0.48 - 0.70)  | 1.64 (1.45 - 1.83)     | 1.29 (1.10 - 1.49)     | 1.29 (1.07 - 1.52)     | 1.64 (1.34 - 1.94)     | 2.64 (2.17 - 3.12)     |
| <b>Sex</b>               |                     |                        |                        |                        |                        |                        |
| Female                   | 0.53 (0.46 - 0.60)  | 1.37 (1.25 - 1.49)     | 1.30 (1.17 - 1.43)     | 1.42 (1.26 - 1.59)     | 2.06 (1.83 - 2.28)     | 2.66 (2.34 - 2.98)     |
| Male                     | 0.76 (0.68 - 0.84)  | 1.89 (1.76 - 2.02)     | 1.78 (1.64 - 1.93)     | 1.91 (1.74 - 2.09)     | 2.64 (2.41 - 2.88)     | 3.27 (2.94 - 3.60)     |
| <b>Ethnicity</b>         |                     |                        |                        |                        |                        |                        |
| White                    | 0.51 ( 0.42 - 0.59) | 1.40 ( 1.25 - 1.54)    | 1.40 ( 1.24 - 1.56)    | 1.61 ( 1.41 - 1.81)    | 1.88 ( 1.62 - 2.14)    | 2.21 ( 1.86 - 2.56)    |
| South Asian              | 0.73 ( 0.63 - 0.82) | 1.64 ( 1.49 - 1.79)    | 1.46 ( 1.31 - 1.62)    | 1.80 ( 1.60 - 1.99)    | 2.51 ( 2.25 - 2.78)    | 3.22 ( 2.85 - 3.60)    |
| Black                    | 0.72 ( 0.58 - 0.87) | 2.25 ( 1.99 - 2.51)    | 1.93 ( 1.65 - 2.20)    | 1.59 ( 1.31 - 1.88)    | 2.75 ( 2.31 - 3.18)    | 4.04 ( 3.38 - 4.70)    |
| Any other Asian          | 0.67 ( 0.43 - 0.91) | 1.72 ( 1.33 - 2.11)    | 1.43 ( 1.03 - 1.83)    | 1.52 ( 1.06 - 1.98)    | 2.79 ( 2.06 - 3.51)    | 3.15 ( 2.18 - 4.11)    |
| Other                    | 0.92 ( 0.54 - 1.29) | 1.59 ( 1.08 - 2.09)    | 2.54 ( 1.81 - 3.26)    | 1.68 ( 0.98 - 2.38)    | 2.42 ( 1.43 - 3.42)    | 3.19 ( 1.78 - 4.59)    |
| Mixed                    | 0.73 ( 0.28 - 1.17) | 0.88 ( 0.37 - 1.39)    | 2.14 ( 1.25 - 3.03)    | 2.43 ( 1.29 - 3.57)    | 3.23 ( 1.65 - 4.81)    | 2.56 ( 0.81 - 4.30)    |
| Chinese                  | 0.66 ( 0.04 - 1.27) | 1.32 ( 0.42 - 2.23)    | 1.68 ( 0.53 - 2.83)    | 0.46 (-0.25 - 1.17)    | 2.68 ( 0.73 - 4.63)    | 0.00 ( 0.00 - 0.00)    |
| Unknown                  | 0.87 ( 0.20 - 1.54) | 3.01 ( 1.56 - 4.45)    | 2.05 ( 0.42 - 3.69)    | 4.15 ( 0.88 - 7.41)    | 2.56 (-0.97 - 6.10)    | 3.33 (-2.06 - 8.73)    |
| <b>Baseline DR grade</b> |                     |                        |                        |                        |                        |                        |
| No retinopathy           | 0.18 ( 0.15 - 0.21) | 0.60 ( 0.54 - 0.66)    | 0.68 ( 0.61 - 0.75)    | 0.91 ( 0.81 - 1.00)    | 1.48 ( 1.34 - 1.62)    | 2.13 ( 1.92 - 2.35)    |
| Retinopathy in one eye   | 1.20 ( 0.97 - 1.44) | 3.41 ( 3.01 - 3.81)    | 3.65 ( 3.19 - 4.11)    | 3.94 ( 3.39 - 4.50)    | 5.32 ( 4.57 - 6.07)    | 6.76 ( 5.68 - 7.83)    |
| Retinopathy in both eyes | 6.87 ( 6.13 - 7.61) | 16.72 ( 15.56 - 17.88) | 13.99 ( 12.70 - 15.28) | 12.56 ( 11.07 - 14.04) | 14.96 ( 13.03 - 16.90) | 13.61 ( 11.20 - 16.03) |

**Supplementary table 4. Incidence rates of any diabetic retinopathy (people with R0M0 at first screen, n = 107,701) and sight-threatening diabetic retinopathy (people with R0M0 and R1M0 at first screen, n = 137,591) per 100 person-years by ethnic group.**

| <b>Ethnicity</b> | <b>Any DR IR (95% CI)</b> | <b>STDR IR (95% CI)</b> |
|------------------|---------------------------|-------------------------|
| White            | 7.78 (7.78 - 7.78)        | 1.77 (1.77 - 1.77)      |
| South Asian      | 8.12 (8.12 - 8.12)        | 2.44 (2.44 - 2.44)      |
| Black            | 8.04 (8.03 - 8.04)        | 2.68 (2.68 - 2.68)      |
| Any other Asian  | 7.48 (7.47 - 7.48)        | 2.24 (2.24 - 2.25)      |
| Other            | 8.38 (8.36 - 8.39)        | 2.33 (2.32 - 2.33)      |
| Mixed            | 7.66 (7.63 - 7.70)        | 2.41 (2.40 - 2.43)      |
| Chinese          | 8.06 (8.00 - 8.12)        | 1.65 (1.63 - 1.67)      |
| Unknown          | 9.33 (9.29 - 9.36)        | 2.61 (2.59 - 2.62)      |

### Supplementary table 5. Cumulative incidence rate of any diabetic retinopathy per 100 person-years by follow-up (95% confidence intervals).

| Characteristic     | Year 1             | Year 2             | Year 3              | Year 4              | Year 5              | Year 10             |
|--------------------|--------------------|--------------------|---------------------|---------------------|---------------------|---------------------|
| <b>Overall</b>     | 3.64 (3.54 - 3.73) | 6.37 (6.24 - 6.49) | 6.97 (6.84 - 7.09)  | 7.22 (7.09 - 7.35)  | 7.47 (7.34 - 7.60)  | 7.95 (7.82 - 8.09)  |
| <b>Age groups</b>  |                    |                    |                     |                     |                     |                     |
| Less than 45 years | 3.31 (3.11 - 3.50) | 6.00 (5.74 - 6.26) | 6.70 (6.43 - 6.98)  | 7.16 (6.88 - 7.44)  | 7.60 (7.31 - 7.89)  | 8.51 (8.20 - 8.81)  |
| 45 to <55 years    | 3.42 (3.23 - 3.60) | 6.10 (5.86 - 6.35) | 6.69 (6.44 - 6.95)  | 6.94 (6.68 - 7.20)  | 7.19 (6.93 - 7.45)  | 7.80 (7.53 - 8.08)  |
| 55 to <65 years    | 3.63 (3.44 - 3.82) | 6.10 (5.86 - 6.35) | 6.61 (6.36 - 6.86)  | 6.77 (6.52 - 7.03)  | 6.97 (6.72 - 7.23)  | 7.32 (7.06 - 7.59)  |
| 65 years and over  | 4.05 (3.87 - 4.23) | 7.05 (6.82 - 7.29) | 7.67 (7.43 - 7.91)  | 7.87 (7.62 - 8.11)  | 8.04 (7.79 - 8.29)  | 8.27 (8.02 - 8.52)  |
| <b>Sex</b>         |                    |                    |                     |                     |                     |                     |
| Female             | 3.50 (3.37 - 3.63) | 6.16 (5.98 - 6.33) | 6.80 (6.62 - 6.99)  | 7.03 (6.85 - 7.22)  | 7.30 (7.11 - 7.48)  | 7.82 (7.62 - 8.01)  |
| Male               | 3.76 (3.63 - 3.89) | 6.56 (6.39 - 6.73) | 7.12 (6.94 - 7.29)  | 7.39 (7.20 - 7.57)  | 7.63 (7.45 - 7.81)  | 8.08 (7.89 - 8.27)  |
| <b>Ethnicity</b>   |                    |                    |                     |                     |                     |                     |
| White              | 3.87 (3.71 - 4.03) | 6.46 (6.26 - 6.67) | 7.06 (6.85 - 7.27)  | 7.24 (7.02 - 7.45)  | 7.43 (7.21 - 7.65)  | 7.78 (7.56 - 8.00)  |
| South Asian        | 3.25 (3.10 - 3.40) | 6.21 (6.01 - 6.42) | 6.91 (6.70 - 7.13)  | 7.19 (6.97 - 7.41)  | 7.51 (7.29 - 7.74)  | 8.12 (7.89 - 8.35)  |
| Black              | 3.92 (3.68 - 4.16) | 6.49 (6.19 - 6.80) | 6.97 (6.65 - 7.29)  | 7.27 (6.95 - 7.60)  | 7.49 (7.16 - 7.82)  | 8.04 (7.70 - 8.38)  |
| Any other Asian    | 3.48 (3.09 - 3.87) | 6.04 (5.54 - 6.55) | 6.49 (5.97 - 7.01)  | 6.85 (6.31 - 7.39)  | 7.03 (6.49 - 7.57)  | 7.48 (6.92 - 8.03)  |
| Other              | 4.07 (3.49 - 4.65) | 6.45 (5.72 - 7.17) | 6.92 (6.17 - 7.67)  | 7.43 (6.65 - 8.20)  | 7.83 (7.03 - 8.62)  | 8.38 (7.56 - 9.20)  |
| Mixed              | 3.01 (2.26 - 3.77) | 5.85 (4.81 - 6.89) | 6.17 (5.10 - 7.24)  | 6.45 (5.36 - 7.55)  | 6.79 (5.68 - 7.91)  | 7.66 (6.48 - 8.85)  |
| Chinese            | 3.79 (2.64 - 4.94) | 7.09 (5.54 - 8.64) | 7.54 (5.95 - 9.13)  | 7.81 (6.19 - 9.43)  | 8.20 (6.54 - 9.85)  | 8.06 (6.42 - 9.70)  |
| Unknown            | 4.12 (3.29 - 4.95) | 7.82 (6.70 - 8.94) | 9.05 (7.85 - 10.24) | 9.08 (7.88 - 10.28) | 9.19 (7.99 - 10.40) | 9.33 (8.11 - 10.54) |



**Supplementary table 6. Semi-parametric multivariable Cox proportional hazards model for interval censored data. Hazard ratios (HR) are mutually adjusted for all factors shown in the table. HR greater than 1 imply greater hazards for vision-threatening diabetic retinopathy (DR). Bold p-values show statistically significant results.**

| Characteristic                            | HR   | 95% CI        | p-value                       |
|-------------------------------------------|------|---------------|-------------------------------|
| Age (per 5-year increase)                 | 0.92 | (0.91 - 0.93) | <b>7.5x10<sup>-129</sup></b>  |
| <b>Age groups</b>                         |      |               |                               |
| <45 years                                 | 1.00 |               |                               |
| 45 to <55 years                           | 0.80 | (0.75 - 0.84) | <b>5.1x10<sup>-23</sup></b>   |
| 55 to <65 years                           | 0.61 | (0.56 - 0.66) | <b>9.7x10<sup>-82</sup></b>   |
| 65 years and over                         | 0.56 | (0.50 - 0.61) | <b>4.2x10<sup>-112</sup></b>  |
| <b>Sex</b>                                |      |               |                               |
| Female                                    | 1.00 |               |                               |
| Male                                      | 1.04 | (1.00 - 1.07) | <b>0.028</b>                  |
| <b>Baseline DR grade</b>                  |      |               |                               |
| No retinopathy                            | 1.00 |               |                               |
| Retinopathy in both eyes                  | 8.00 | (7.96 - 8.05) | <b>3.5x10<sup>-2209</sup></b> |
| Retinopathy in one eye                    | 3.07 | (3.03 - 3.11) | <b>1.0x10<sup>-632</sup></b>  |
| <b>Ethnicity</b>                          |      |               |                               |
| White                                     | 1.00 |               |                               |
| South Asian                               | 1.37 | (1.33 - 1.41) | <b>1.9x10<sup>-51</sup></b>   |
| Black                                     | 1.58 | (1.53 - 1.63) | <b>9.1x10<sup>-76</sup></b>   |
| Any other Asian                           | 1.26 | (1.18 - 1.34) | <b>1.4x10<sup>-09</sup></b>   |
| Other                                     | 1.30 | (1.2 - 1.39)  | <b>1.2x10<sup>-07</sup></b>   |
| Mixed                                     | 1.38 | (1.23 - 1.53) | <b>1.9x10<sup>-05</sup></b>   |
| Chinese                                   | 0.98 | (0.75 - 1.22) | 0.888                         |
| Unknown                                   | 1.38 | (1.16 - 1.59) | <b>0.003</b>                  |
| <b>Duration of diabetes (per 5 years)</b> | 1.15 | (1.14 - 1.16) | <b>3.3x10<sup>-136</sup></b>  |
| <b>Type of diabetes</b>                   |      |               |                               |
| Type 2                                    | 1.00 |               |                               |
| Type 1                                    | 1.02 | (0.94 - 1.11) | 0.594                         |
| Other                                     | 0.71 | (0.19 - 1.24) | 0.198                         |
| Missing                                   | 1.25 | (1.12 - 1.37) | <b>5.5x10<sup>-04</sup></b>   |
| <b>IMD</b>                                |      |               |                               |
| 1 (Most deprived)                         | 1.00 |               |                               |
| 2                                         | 1.04 | (0.98 - 1.10) | 0.239                         |
| 3                                         | 1.02 | (0.96 - 1.08) | 0.444                         |
| 4                                         | 0.98 | (0.92 - 1.05) | 0.586                         |
| 5 (least deprived)                        | 0.93 | (0.85 - 1.01) | 0.064                         |

<sup>†</sup>HR = Hazard Ratio, CI = Confidence Interval

**Supplementary table 7. Multivariable Cox proportional hazards model for right censored data with development of any diabetic retinopathy (DR) as outcome of interest. Hazard ratios (HR) are mutually adjusted for all factors shown in the table. HR greater than 1 imply greater hazards for DR. Bold p-values show statistically significant results.**

| Characteristic                             | HR <sup>1</sup> | 95% CI <sup>1</sup> | p-value                      |
|--------------------------------------------|-----------------|---------------------|------------------------------|
| Age (per 5-year increase)                  | 0.99            | 0.98, 0.99          | <b>2.4x10<sup>-12</sup></b>  |
| Age categories                             |                 |                     |                              |
| <45yr                                      | 1.00            |                     |                              |
| 45 to <55yr                                | 0.90            | 0.87, 0.93          | <b>3.9x10<sup>-11</sup></b>  |
| 55 to <65yr                                | 0.81            | 0.78, 0.84          | <b>4.8x10<sup>-39</sup></b>  |
| 65yr and over                              | 0.87            | 0.84, 0.90          | <b>6.8x10<sup>-18</sup></b>  |
| Sex                                        |                 |                     |                              |
| Female                                     | 1.00            |                     |                              |
| Male                                       | 1.06            | 1.03, 1.08          | <b>1.5x10<sup>-07</sup></b>  |
| Ethnicity                                  |                 |                     |                              |
| White                                      | 1.00            |                     |                              |
| South Asian                                | 1.03            | 1.00, 1.06          | <b>0.021</b>                 |
| Black                                      | 1.03            | 1.00, 1.06          | 0.070                        |
| Any other                                  | 0.96            | 0.92, 1.01          | 0.096                        |
| Asian                                      |                 |                     |                              |
| Other                                      | 1.09            | 1.02, 1.16          | <b>0.006</b>                 |
| Mixed                                      | 1.03            | 0.94, 1.13          | 0.550                        |
| Chinese                                    | 1.06            | 0.94, 1.20          | 0.318                        |
| Unknown                                    | 1.36            | 1.21, 1.54          | <b>5.7x10<sup>-07</sup></b>  |
| Duration of diabetes (per 5-year increase) | 1.18            | 1.17, 1.19          | <b>1.1x10<sup>-377</sup></b> |
| Type of diabetes                           |                 |                     |                              |
| Type 2                                     | 1.00            |                     |                              |
| Type 1                                     | 1.36            | 1.28, 1.44          | <b>2.5x10<sup>-26</sup></b>  |
| Other                                      | 1.01            | 0.77, 1.32          | 0.951                        |
| Missing                                    | 1.25            | 1.16, 1.35          | <b>7.6x10<sup>-09</sup></b>  |
| Deprivation (IMD quintiles)                |                 |                     |                              |
| 1                                          | 1.00            |                     |                              |
| 2                                          | 0.99            | 0.96, 1.03          | 0.692                        |
| 3                                          | 0.98            | 0.95, 1.02          | 0.338                        |
| 4                                          | 0.98            | 0.94, 1.02          | 0.318                        |
| 5                                          | 0.97            | 0.93, 1.01          | 0.152                        |
| Missing                                    | 1.78            | 1.05, 3.02          | <b>0.032</b>                 |

<sup>1</sup>HR = Hazard Ratio, CI = Confidence Interval
